# Supplementary material
Source: PubMed Central journal article supplement (PMC3178675)

# **Mutagenesis of beryllium-specific T cell receptors suggests an unusual binding topology for antigen recognition**

## **Supplemental Data**

Natalie A. Bowerman<sup>\*</sup>, Michael T. Falta<sup>\*</sup>, Douglas G. Mack<sup>\*</sup>, John W. Kappler<sup>†‡</sup>, and Andrew P. Fontenot<sup>\*†2</sup>

<sup>\*</sup>Department of Medicine, University of Colorado Denver, Aurora, CO 80045, USA

<sup>†</sup>Integrated Department of Immunology, National Jewish Health, Denver, CO 80206, USA

<sup>‡</sup>Howard Hughes Medical Institute and National Jewish Health, Denver, CO 80206, USA

## **SUPPLEMENTAL FIGURE LEGENDS**

**SUPPLEMENTAL FIGURE 1.** Levels of TCR variants expressed on the cell surface of murine T cell hybridoma line, 5KC. Flow cytometry was used to measure cell surface expression of wild-type and variant TCR expressed on the murine T cell hybridoma line 5KC, designated 1332-28. Positive populations represent cells stained with a mAb specific for the murine T cell receptor C $\beta$  domain while the negative population represents unstained cells.

**SUPPLEMENTAL FIGURE 2.** Stimulation of Be-responsive V $\beta$ 5<sup>+</sup> T cell hybridomas expressing TCR variants. T cell hybridomas 1332-28, -22, and -2, expressing selected *TCRA* and *TCRB* variants, were stimulated with murine fibroblast line DAP.3 transfected with HLA-DP2, and various concentrations of BeSO<sub>4</sub>. Hybridoma secretion of IL-2 was measured by ELISA, and activation curves were generated by plotting % maximal IL-2 release versus the concentration of BeSO<sub>4</sub>. In order to quantitatively display the EC<sub>50</sub> differences of the individual variant TCRs, the overall EC<sub>50</sub> fold-change difference (mean  $\pm$  SEM) for each TCR compared to the wild-type TCR for three separate experiments is shown. The dotted line set at y = 1 represents the response of the wild-type T cell hybridoma.

**SUPPLEMENTAL FIGURE 3.** Deduced amino acid sequence of the *TCRB* and *TCRA* CDR3 sequence of 1041-3.3. The T cell clone was isolated from the lung of CBD patient 1041 and expressed *TCRBV3* and *TCRAVI*. These sequence data are available from GenBank under accession numbers JN019785 - JN019786.

**SUPPLEMENTAL FIGURE 4.** Alternative docking footprints for Be-specific TCR recognition of antigen. A, Top-down view showing predicted interactions of TCR CDRs with HLA-DP2. Crystal

structure of HLA-DP2 with self-derived DR  $\alpha$ -chain peptide (gray) as depicted with PyMol software (PDB ID code, 3LQZ) is shown. TCR CDRs are highlighted in yellow (CDR1 $\alpha$ ), orange (CDR2 $\alpha$ ), red (CDR3 $\alpha$ ), purple (CDR1 $\beta$ ), green (CDR2 $\beta$ ), and blue (CDR3 $\beta$ ). Placement of TCR CDRs is speculative based upon the current studies involving site-directed mutagenesis of TCR and HLA-DP2. In *A*, the TCR docking footprint is shifted toward the  $\beta$ 1 helix of HLA-DP2, with CDR1 $\alpha$  and CDR2 $\alpha$  making no MHCII contacts. *B*, The binding polarity for TCR recognition of HLA-DP2 is reversed, with TCR V $\beta$  CDRs and  $\beta$ 1 helix residues of HLA-DP2 dominating.

# Supplemental Figure 1

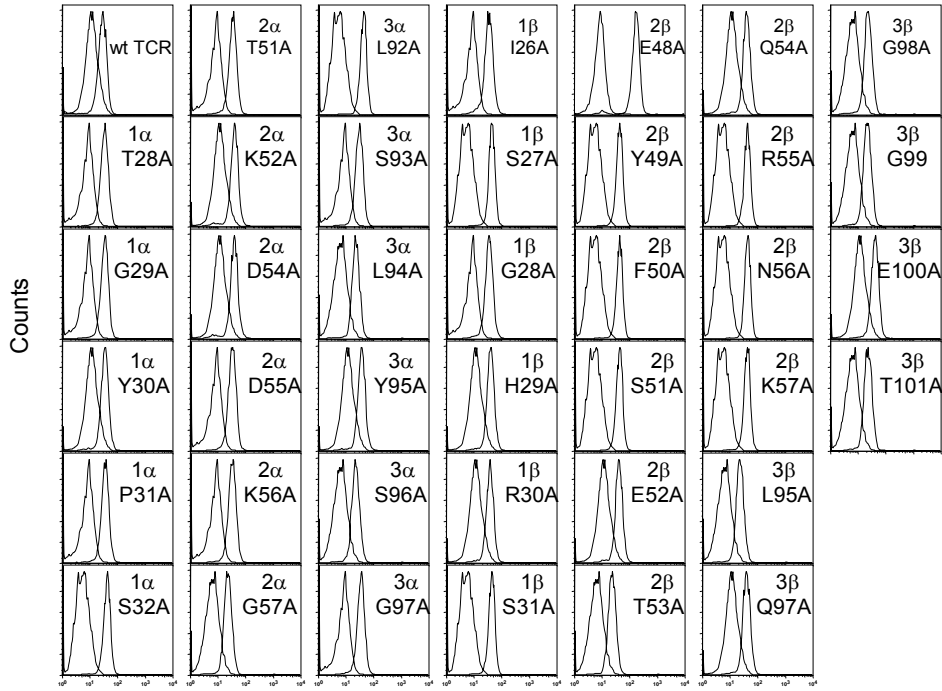

1332-28 T cell receptor variants

## Supplemental Figure 2

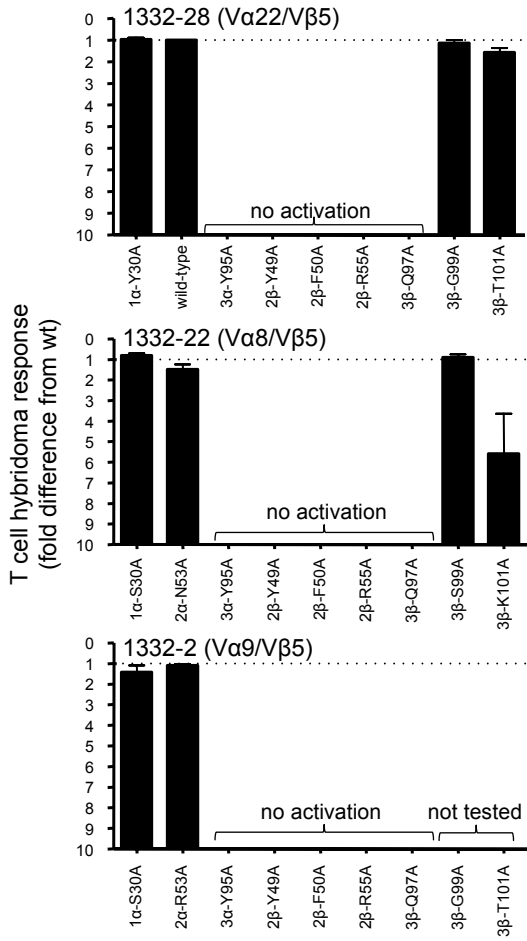

### Supplemental Figure 3

|           | <i>BV3</i> | <i>NDN</i> | <i>BJ2.2</i>  | <i>AV1S3</i> | <i>N</i> | <i>AJ4</i>  |
|-----------|------------|------------|---------------|--------------|----------|-------------|
| 1041.-3.3 | C A T G G  | R A R G    | T G E L F F G | C A          | V S R V  | S G G Y N K |

## Supplemental Figure 4

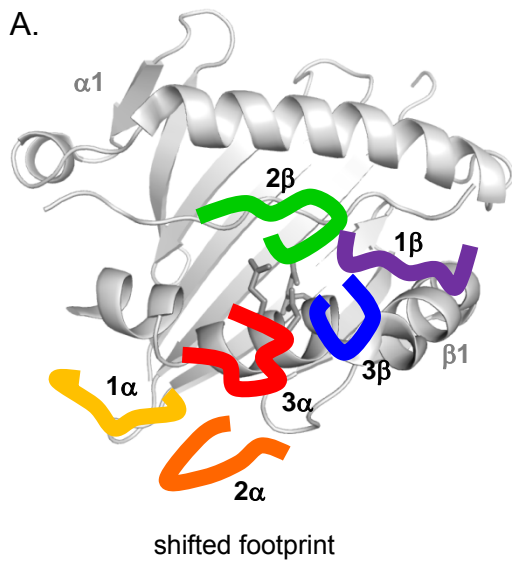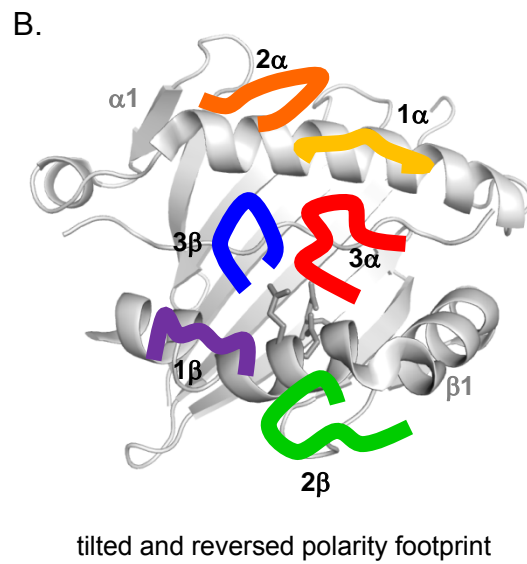

Supplement: NIHMS315214-supplement-1.pdf [file NIHMS315214-supplement-1.pdf]
